# Supplementary figures and images for: Hydrophilic molecularly imprinted microspheres functionalized with amino and carboxyl groups for highly selective recognition of human hemoglobin in aqueous solution
Source: Royal Society of Chemistry journal article supplement (doi:10.1039/c5ra04488j), 2015-01-01

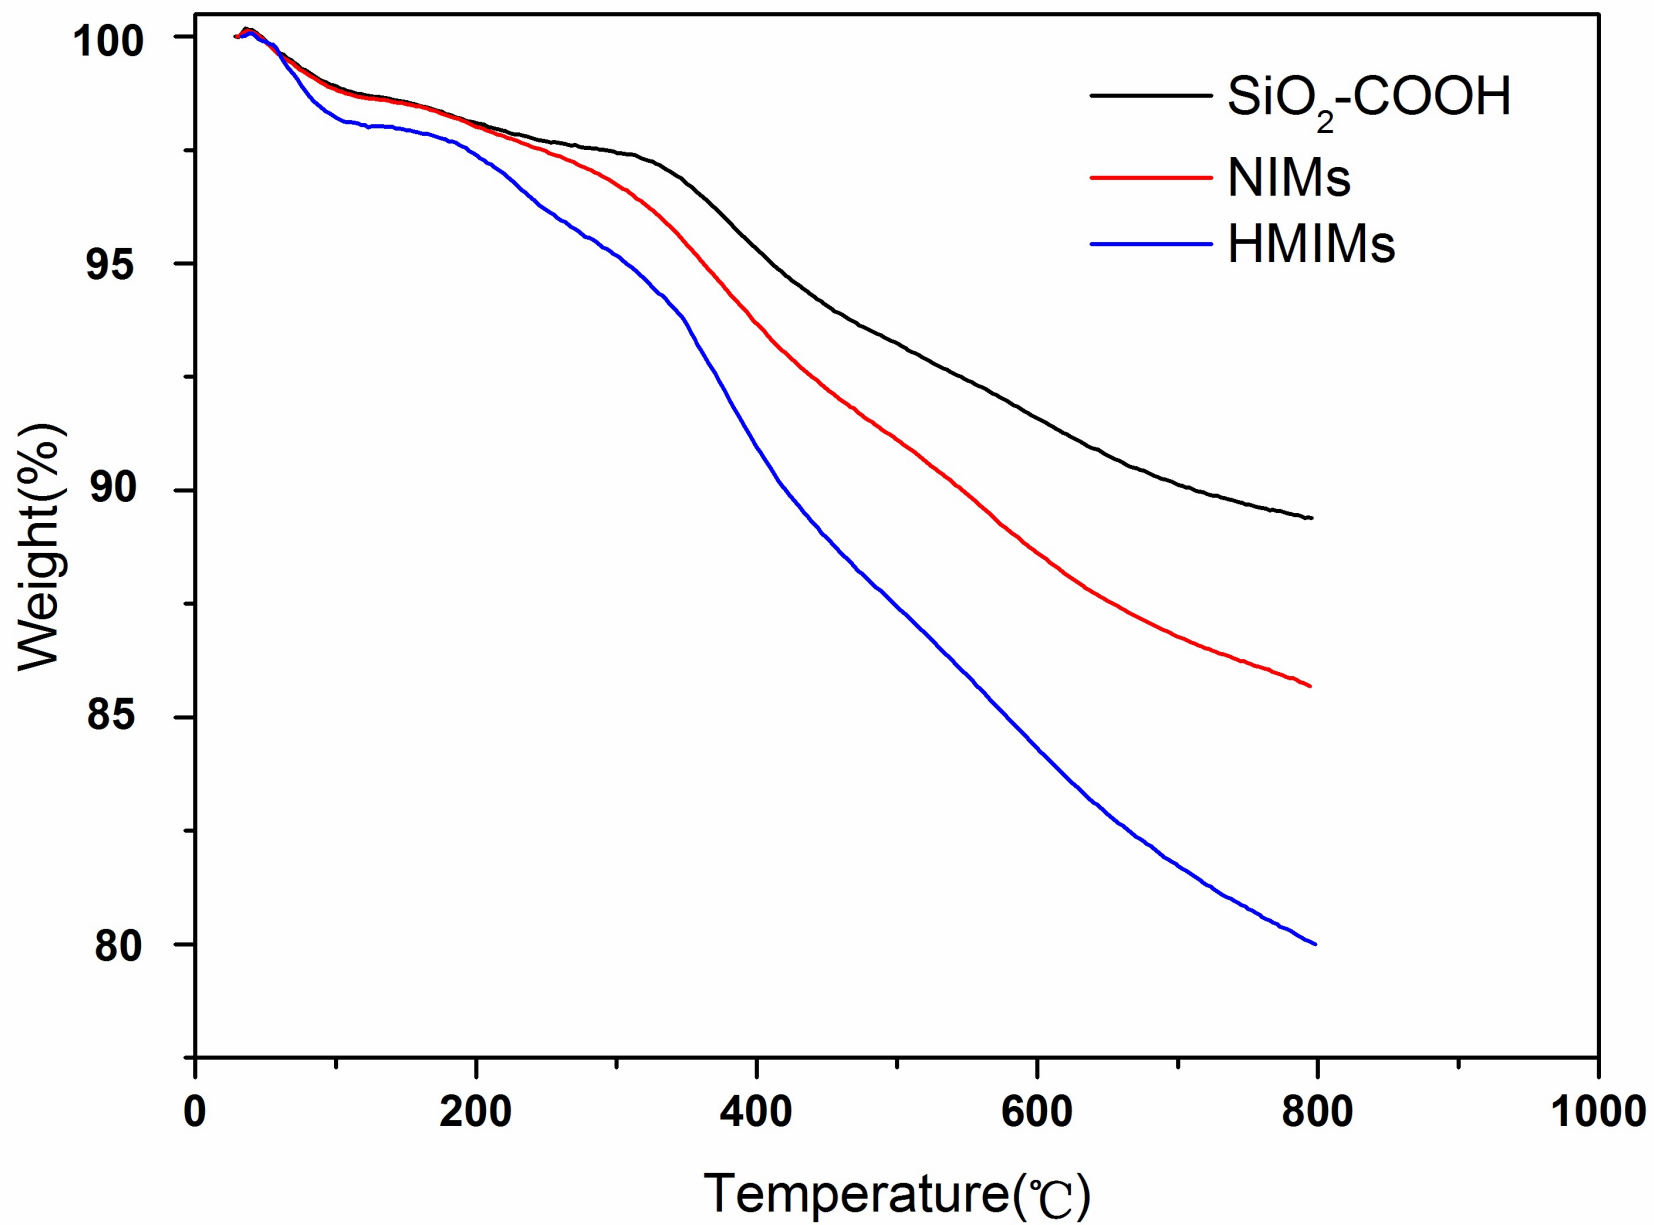

Supplement: c5ra04488j1.pdf [file c5ra04488j1.pdf]
